# Supplementary material
Source: HighWire-hosted journal article supplement (https://bmjopen.bmj.com/content/13/5/e069249)
Supplement: inline-supplementary-material-2 [file inline-supplementary-material-2.pdf]

**Measurement of the Perception of a Stimulating Environment Questionnaire (MPSEQ)**

(Chatard A, Barillot L, Besnier M, et al. Measurement of the Perception of a Stimulating Environment Questionnaire, unpublished)

Please indicate your degree of agreement with the statements below using the following response scale: 1 = Strongly disagree; 2 = Disagree; 3 = Somewhat disagree; 4 = Neither agree nor disagree; 5 = Somewhat agree; 6 = Agree; 7 = Strongly agree

1. My immediate environment is rich in sensations and stimuli of all kinds \_\_\_\_
2. Often, I tell myself that my life is not very exciting \_\_\_\_
3. I practice many physical and/or sports activities \_\_\_\_
4. My physical and/or sports activities are a source of personal development \_\_\_\_
5. I have a rich inner life \_\_\_\_
6. I play and/or listen to a lot of music \_\_\_\_
7. I watch a lot of exiting and stimulating films and documentaries \_\_\_\_
8. I have a lot of friends and social connections \_\_\_\_
9. My social relationships are rich and stimulating \_\_\_\_
10. I do many diverse and varied activities \_\_\_\_
11. I have a passion in life (ex: a hobby) \_\_\_\_
12. I live in a stimulating environment \_\_\_\_
13. I have the impression that my daily environment is boring, that it is always the same \_\_\_\_
