# Supplementary material
Source: HighWire-hosted journal article supplement (https://bmjopen.bmj.com/content/13/5/e069249)
Supplement: inline-supplementary-material-3 [file inline-supplementary-material-3.pdf]

Table 1

Study schedule of enrolment and assessments by time points (Tn).

S1, S2, S3, S4, S5 and S6 refer to the 6 different EE sessions of the enhanced intervention.

| Time point                | Enrolment | Enhanced intervention |    |    |    |    |    | Post-intervention | Follow-ups |    |    |
|---------------------------|-----------|-----------------------|----|----|----|----|----|-------------------|------------|----|----|
|                           | T0        | T1                    |    |    |    |    |    | T2                | T3         | T4 | T5 |
|                           |           | S1                    | S2 | S3 | S4 | S5 | S6 |                   |            |    |    |
| Eligibility screening     | X         |                       |    |    |    |    |    |                   |            |    |    |
| Informed consent          | X         |                       |    |    |    |    |    |                   |            |    |    |
| Group allocation          | X         |                       |    |    |    |    |    |                   |            |    |    |
| <b>Primary outcome</b>    |           |                       |    |    |    |    |    |                   |            |    |    |
| TLFB                      |           |                       |    |    |    |    |    |                   | X          | X  | X  |
| Breathalyser              |           |                       |    |    |    |    |    |                   | X          | X  | X  |
| Blood test                |           |                       |    |    |    |    |    | X                 | X          | X  | X  |
| <b>Secondary outcomes</b> |           |                       |    |    |    |    |    |                   |            |    |    |
| OCDS                      | X         |                       |    |    |    |    |    |                   | X          | X  | X  |
| Craving induced by cues   | X         |                       |    |    |    |    |    | X                 |            |    |    |
| IAT                       | X         |                       |    |    |    |    |    | X                 |            |    |    |
| Alcohol seeking           | X         |                       |    |    |    |    |    | X                 |            |    |    |
| Alcohol attentional bias  | X         |                       |    |    |    |    |    | X                 |            |    |    |
| MPSEQ                     | X         |                       |    |    |    |    |    |                   | X          | X  | X  |
| FFMQ                      | X         |                       | X  |    |    |    |    | X                 |            |    |    |
| Salivary cortisol         | X         |                       |    |    |    | X  | X  |                   |            |    |    |
